# Supplementary material for: Characterization and Evaluation of Thaw-Slumping Using GPR Attributes in the Qinghai–Tibet Plateau
Source: MDPI journal article supplement (doi:10.3390/rs15092273), 2023-04-25
Supplement: s1 [file s1]

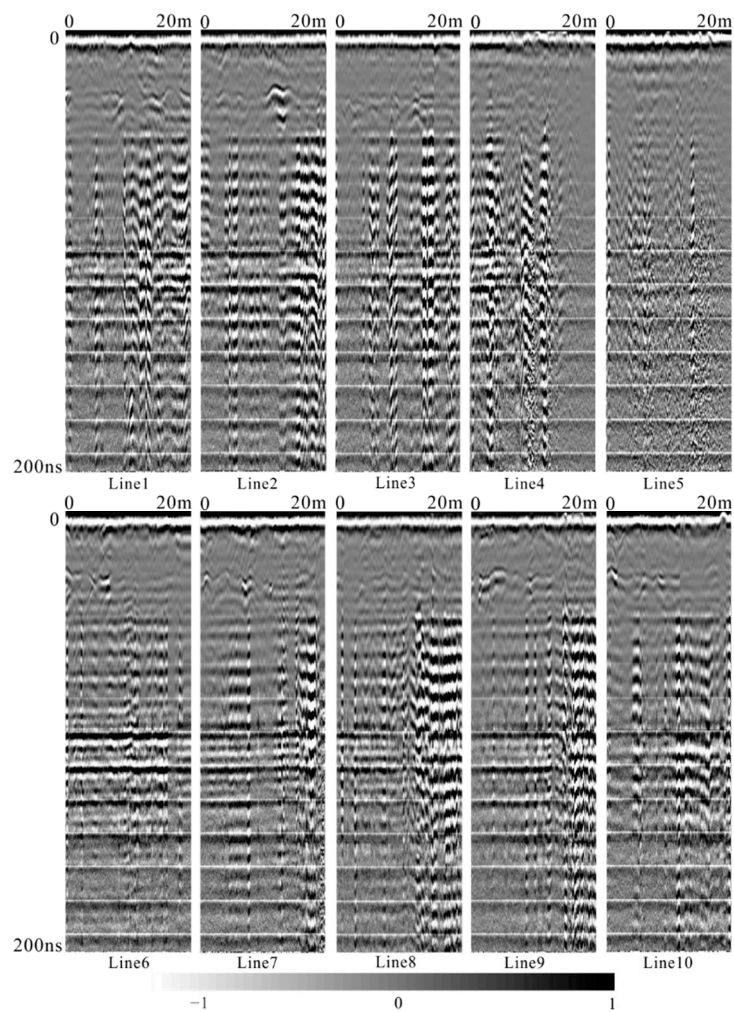

**Figure S1.** Grayscale display of raw data.

Figure shows the grayscale display of the original collected data of line 1 to line 10. The noise interference in the original data is strong, and the data needs to be analyzed and processed.
